# Supplementary material for: Generalized quadratic model for charge transfer
Source: Royal Society of Chemistry journal article supplement (doi:10.1039/d5cp00866b), 2025-01-01
Supplement: d5cp00866b1.pdf [file d5cp00866b1.pdf]

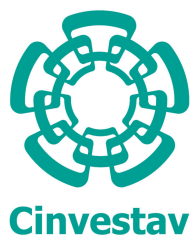

**Alberto Vela**  
Department of Chemistry  
Center for Research and Advanced Studies  
avela@cinvestav.mx  
<https://cinvestav.mx/zacatenco/quimica>

March 3, 2025

Electronic Supplementary Information (ESI) available: [Detailed computed chemical hardness for the G3/99 set, sorted by species and choice of density functional approximation]
